# Supplementary material for: Layer-by-layer self-assembled multilayers of redox polyelectrolytes and gold nanoparticles
Source: Royal Society of Chemistry journal article supplement (doi:10.1039/b305347d), 2003-01-01
Supplement: b305347d.doc [file b305347d.doc]

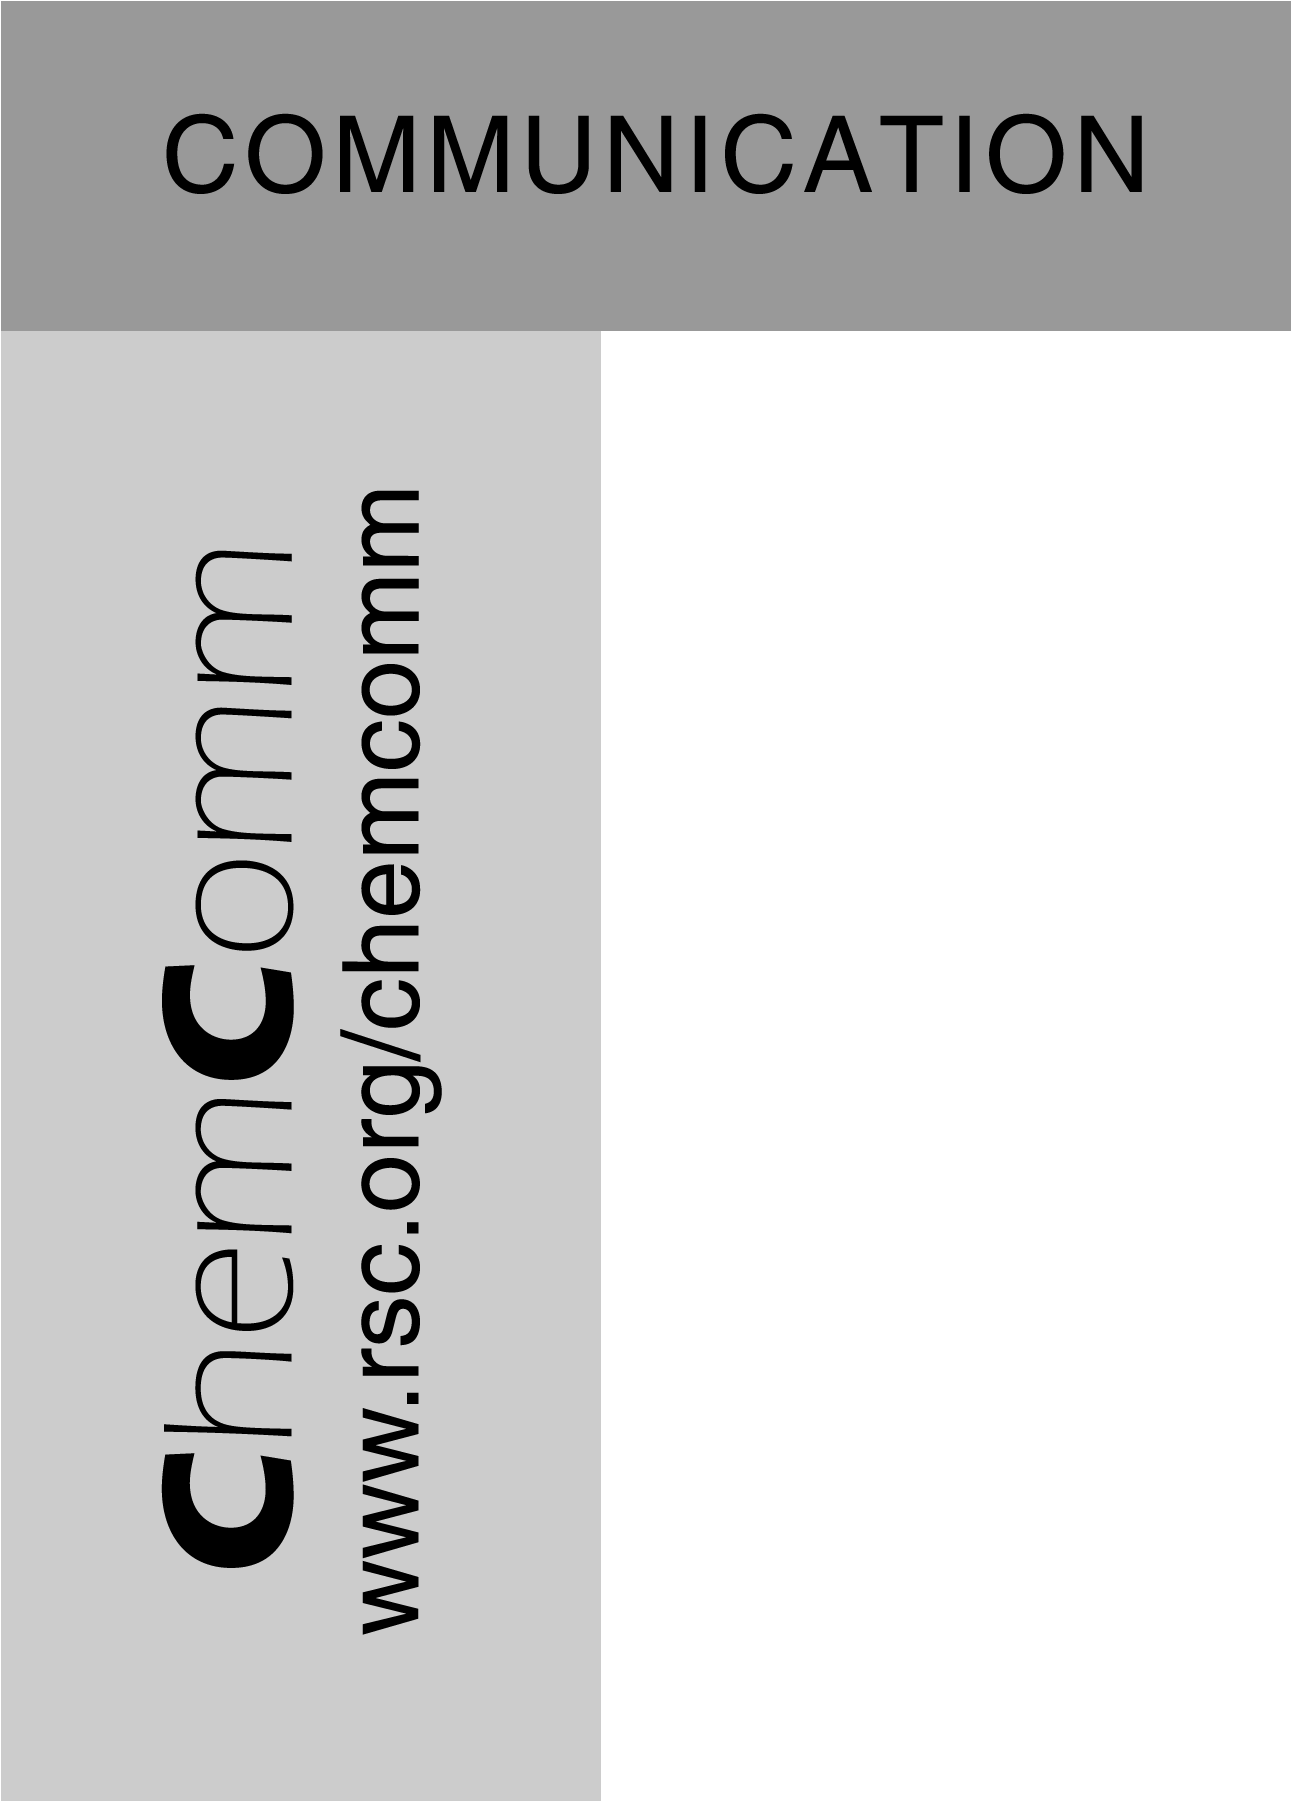
Supplementary material (ESI) for Chemical Communications

Layer by layer self-assembled multilayers of redox polyelectrolytes and gold nanoparticles

Nancy Ferreyra,*a* Liliane Coche-Guérente,*a* Julien Fatisson,*a* Manuel Lopez Teijelo*b* and Pierre Labbé**a*

a Laboratoire d’Electrochimie Organique et de Photochimie Rédox, UMR CNRS 5630, Institut de Chimie Moléculaire de Grenoble, FR CNRS 2607, Université Joseph Fourier, BP 53, 38041 Grenoble cédex 09, France. Fax: +33 4 76514 67; Tel: +33 4 76514718; E-mail: Pierre.Labbe@ujf-grenoble.fr

b INFIQC, Departamento de Fisicoquímica, Facultad de Ciencias Químicas, Universidad Nacional de Córdoba, Pabellón Argentina, Ciudad Universitaria, 5000 Córdoba, Argentina. Fax: +54 351 334188; Tel: +54 351 4334169; E-mail: mlopez@mail.fcq.unc.edu.ar

This submission was created using the RSC ChemComm Template (DO NOT DELETE THIS TEXT)

(LINE INCLUDED FOR SPACING ONLY - DO NOT DELETE THIS TEXT)

S-1 shows the chemical structure of the viologen- functionnalized poly(4-vinylpyridinium) PV whose synthesis and characterization have been reported in a previous work [N. F. Ferreyra, L. Coche-Guerente, P. Labbe, E. Calvo and V. Solis, *Langmuir*, 2003, 19, 3864].

NP gold colloids were obtained from Sigma and were synthesized following the tannic acid/citrate method [J.W. Slot and H.J. Geuze, *Eur. J. Cell Biol*., 1985, **38**, 87]. According to the certificate of analysis the mean particle diameters of the NP6 and NP11 colloids used in this study were respectively 6.4±0.6 nm and 11.0±0.7 nm. These characteristics have been confirmed by transmission electron microscopy and SAXS. The particle concentration provided by Sigma, respectively 1.8×1013 and 3.72×1012 particles/mL for NP6 and NP11 colloids, have been used to estimate the NP surface coverage in PV-NP bilayer from UV-visible absorption experiments. In a first approximation, it was assumed for these calculations that the surface plasmon resonance absorption band of NP immobilized in a PV-NP assembly keep the same characteristics as those measured in the native Sigma colloidal dispersion, that is an absorbance at 520 nm of 0.96 and 0.75 (l=1 cm) respectively for the native NP6 and NP11 Sigma colloids. The growing of multilayered PV-NP assemblies onto quartz slides was evidenced from the stepwise increase of the NP6 or NP11 surface plasmon resonance absorption band intensity (Fig. 1B of the paper). The observed linear increase in absorbance, respectively 0.0074 and 0.0316 for each layer of NP6 and NP11 on average, allows to determine a surface coverage of 1.3×1011 and 1.6×1011 nanoparticles/cm2 respectively for each layer of NP6 or NP11 in PV-NP assemblies.

S-2 shows the  trajectories obtained at two wavelengths (546.1 and 632.8 nm) for PV-NP6 assemblies ended either by PV or NP6. These trajectories were fitted on the basis of a single layer of isotropic optical properties. The mean thickness determined from the fits is presented as a function of layer number in Fig. 2 of the paper.

S-3 shows the evolution of the NP6 surface plasmon resonance absorbance (max=515 nm) during its assembly onto a quartz slide previously modified by a PV monolayer as a function of the contact time of the NP6 colloid with the quartz surface. The NP6 surface coverage increases with time until a plateau is reached after 90 min. The experiments and results presented in the communication were mainly realized with a NP adsorption contact time of 15 min. Other experiments were realized with a NP adsorption time of 60 min.

S-4 compares the surface coverage evolution of electroactive viologen moieties in an Au/MPS/(PV-NP6)n assembly as a function of layer number for NP adsorption contact time of 15 and 60 min. It can be seen that a higher NP6 surface coverage gives a lower surface coverage of electroactive viologen.

n  571

x  163

MW  135 kD

max = 460 nm

460 = 313 000 L mol-1 cm-1

**S-1**: Structure of polyviologen PV.

**S-2**: Ellipsometric parameters obtained at (A) 546.1 and (B) 632.8 nm for the PV () and NP6 () adsorption during the assembling of a (PV-NP6)n multiplayer onto an Au/MPS surface. Fit corresponding to PV (---) and NP () adsorption.

**S-3**: Evolution of the NP6 surface plasmon resonance absorbance (max=515 nm) during the assembling of NP6 onto a quartz slide previously modified by a PV monolayer as a function of the contact time of the NP6 colloid with the quartz surface.

**S-4**: Evolution of the surface coverage of electroactive viologen in an Au/MPS/(PV-NP6)n assembly as a function of layer number for a NP6 adsorption step contact time of (a) 15 and (b) 60 min.
